# Supplementary material
Source: PubMed Central journal article supplement (PMC3811195)
Supplement: AEM.01641-13_zam999104763so1.pdf [file AEM.01641-13_zam999104763so1.pdf]

1

**SUPPLEMENTAL FIGURES\_revised version**

2

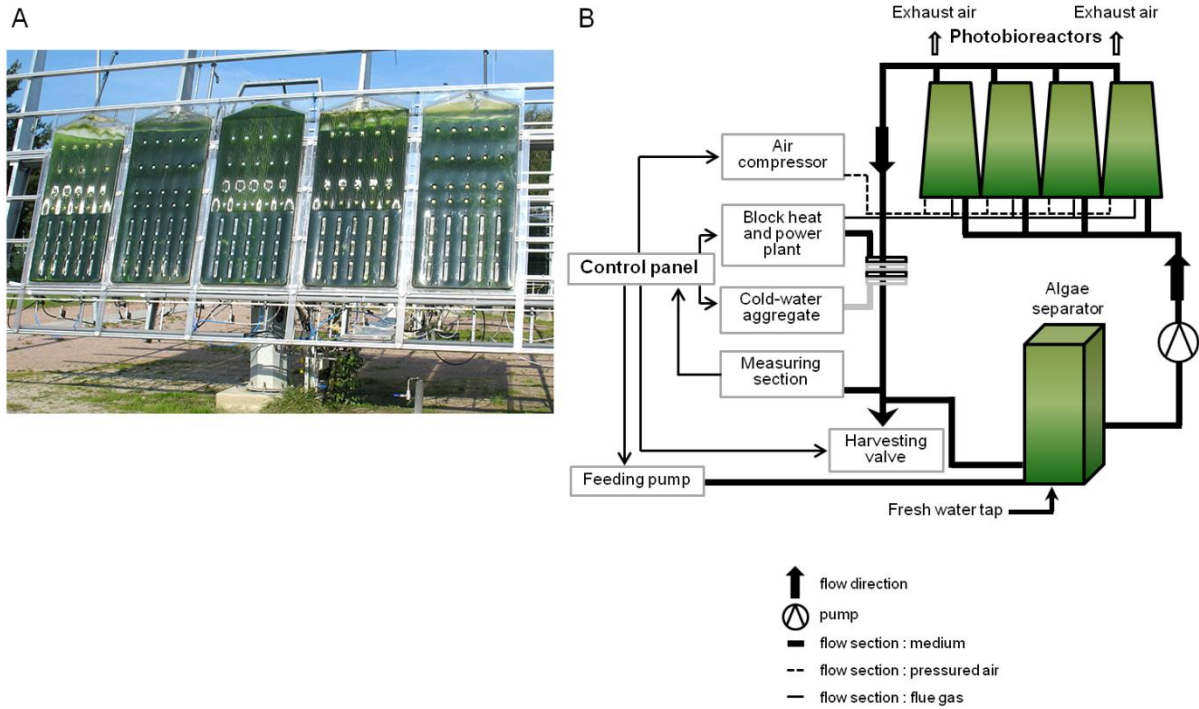

3

FIGURE S1, Krohn-Molt et al 2013,

4

**FIGURE S1:** **A:** Photobioreactors mounted on a solar tracker. **B:** Flow chart of the microalgae pilot plant's function (modified from S. Hindersin, M. Leupold, M. Kerner, and D. Hanelt, "Irradiance optimization of outdoor microalgal cultures using solar tracked photobioreactors," *Bioprocess Biosyst. Eng.* 36:345-355, 2013, Fig. 2, with kind permission from Springer Science and Business Media [copyright 2013 Springer-Verlag]). For the duration of cultivation, part of the culture medium circulates through an external circuit. The algal biomass was harvesting continuously, which adjusts cell density to a constant value. The process parameters were monitored by measuring the temperature, turbidity, pH, O<sub>2</sub>, NH<sub>4</sub><sup>+</sup>, NO<sub>3</sub><sup>-</sup>, and K<sup>+</sup>. Above a set value, nutrients were added automatically. A heat exchanger within the circular flow allowed temperature control.

14

15

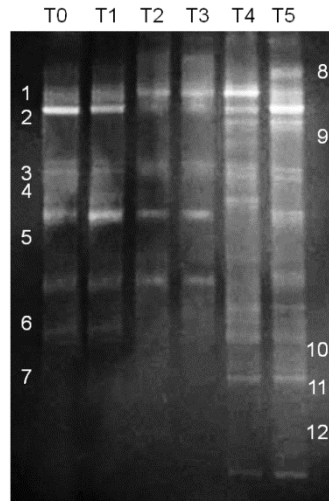

FIGURE S2, Krohn-Molt et al 2013

16

17 **FIGURE S2:** DGGE analysis of PCR-amplified 16S rRNA gene fragments obtained  
 18 from six biofilm samples. Lanes 1-6 represent the different time points (T0-T5) of  
 19 sampling, which were taken in 14 day intervals. The different DGGE bands (1-13)  
 20 represent the 16S rRNA fragments of associated microorganisms, which could be  
 21 assigned to sequences stored in the NCBI database. **(1)** *Pedobacter* sp.  
 22 (EU585748.1), **(2)** *Flavobacterium* sp. (JX827624.1), **(3)** *Acidovorax* sp.  
 23 (KC464816.1), **(4)** *Rhodobacter* sp. (KC157045.1), **(5)** plastid gene of *Nitzschia*  
 24 *frustulum* (AY221721.1), **(6)** chloroplast of *Scenedesmus obliquus* (DQ396875.1),  
 25 **(7)** chloroplast of *Chlorella vulgaris* (AB001684.1), **(8)** Bacteroidetes bacterium  
 26 (HM205113.1), **(9)** *Sinorhizobium* sp. (JQ316267.1), **(10)** *Caulobacter* sp.  
 27 (EF020225.1), **(11)** uncultured Bacteroidetes bacterium (DQ463716.2),  
 28 **(12)** uncultured Bacteroidetes bacterium (AY874003.1), **(13)** Gemmatimonadetes  
 29 bacterium (JQ177808.1).

30

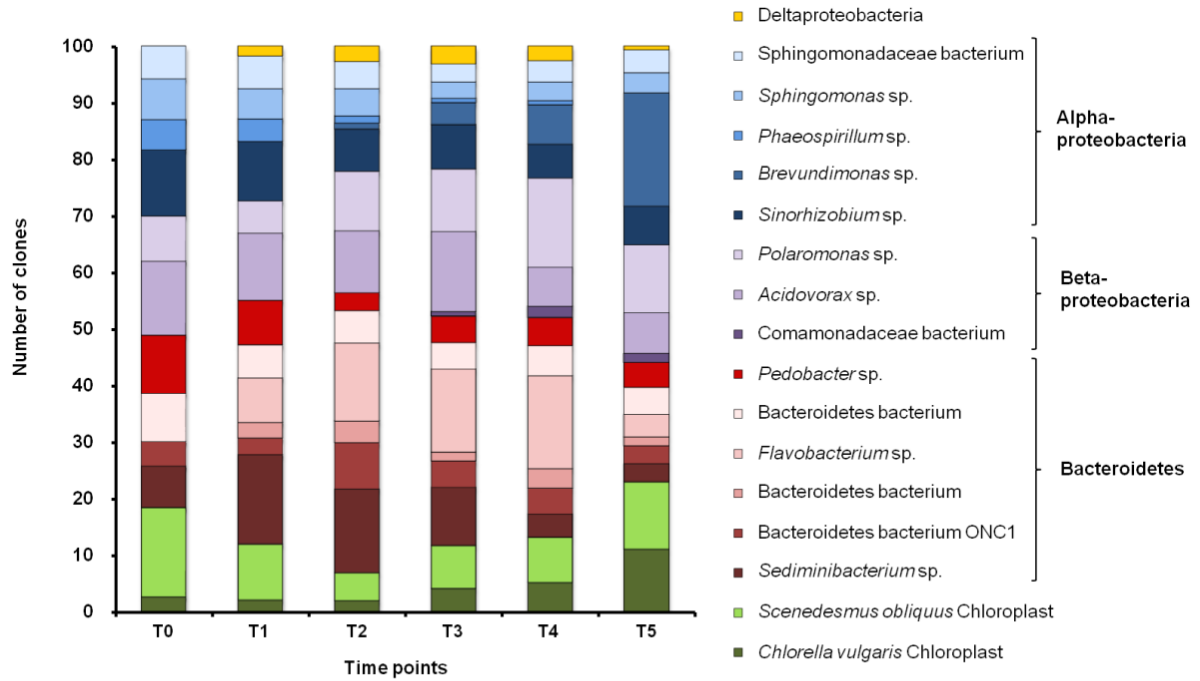

31 FIGURE S3, Krohn-Molt et al 2013

32 **FIGURE S3:** Assignment of phylogenetic classes and orders of 16S rRNA sequences  
 33 from the RFLP analysis. Per sample (T0-T5), 100 clones were analysed.

34

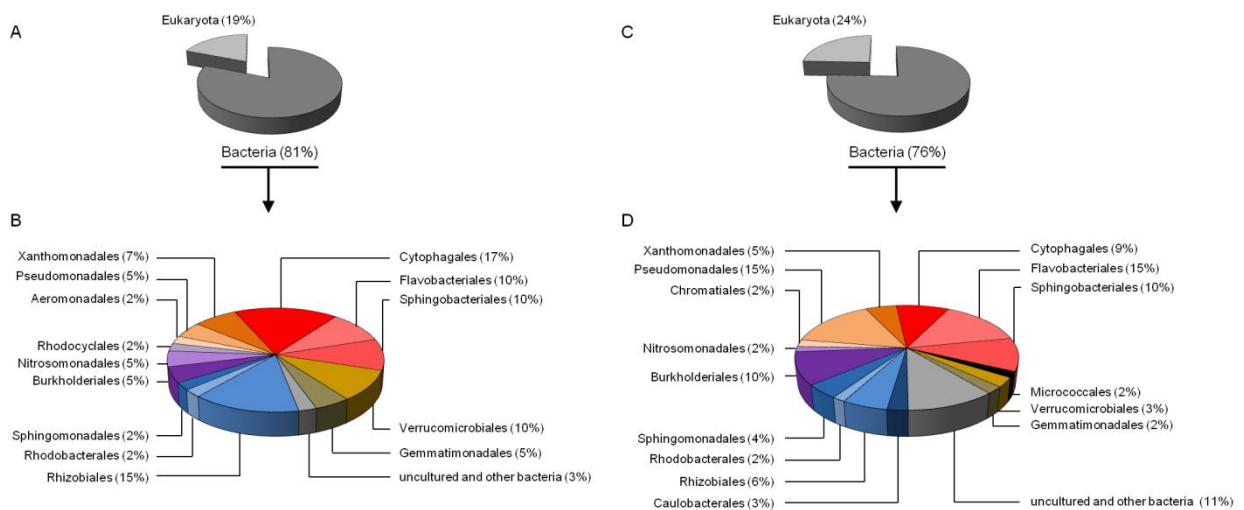

35 FIGURE S4, Krohn-Molt et al 2013

36 **FIGURE S4.** Distribution of phylogenetic classes and orders of the metagenome-  
 37 derived sequences in the PBR biofilm community. **A:** Overall diversity of 226  
 38 sequences from the FLX 454 dataset (Eukaryota 19%, Bacteria 81%),

39 **B:** Phylogenetic classification of the V6 region of the 16S rRNA from the FLX 454  
40 dataset (41 sequences). Alphaproteobacteria are represented by Sphingomonadales  
41 (2%), Rhodobacterales (2%), and Rhizobiales (15%). Betaproteobacteria were  
42 composed of Rhodocyclales (2%), Nitrosomonadales (5%), and Burkholderiales  
43 (5%). Gammaproteobacteria consisted of Xanthomonadales (7%), Pseudomonadales  
44 (5%), and Aeromonadales (2%). Bacteroidetes included Cytophagales (17%),  
45 Flavobacteriales (10%), and Sphingobacteriales (10%). 10% could be assigned to  
46 Verrucomicrobia (Verrucomicrobiales), and 5% could be classified as  
47 Gemmatimonadetes (Gemmatimonadales). **C:** Overall diversity of 137,506  
48 sequences from the Illumina dataset (Eukaryota 24%, Bacteria 76%),  
49 **D:** Phylogenetic classification of the V6 region of the 16S rRNA from the Illumina  
50 dataset (558 sequences). Alphaproteobacteria are represented by  
51 Sphingomonadales (4%), Rhodobacterales (2%), Rhizobiales (6%), and  
52 Caulobacterales (3%). Betaproteobacteria were composed of Nitrosomonadales (2%),  
53 and Burkholderiales (10%). Gammaproteobacteria consisted of Xanthomonadales  
54 (5%), Pseudomonadales (15%), and Chromatiales (2%). Bacteroidetes included  
55 Cytophagales (9%), Flavobacteriales (15%), and Sphingobacteriales (10%). 2% were  
56 represented by Actinobacteria (Micrococcales). 3% could be assigned to  
57 Verrucomicrobia (Verrucomicrobiales), and 2% could be classified as  
58 Gemmatimonadetes (Gemmatimonadales). Phylogenetic groups accounting for <1%  
59 of the sequences and sequences which were not assigned to a specific taxonomic  
60 group were summarized in the artificial groups “uncultured and other bacteria”.

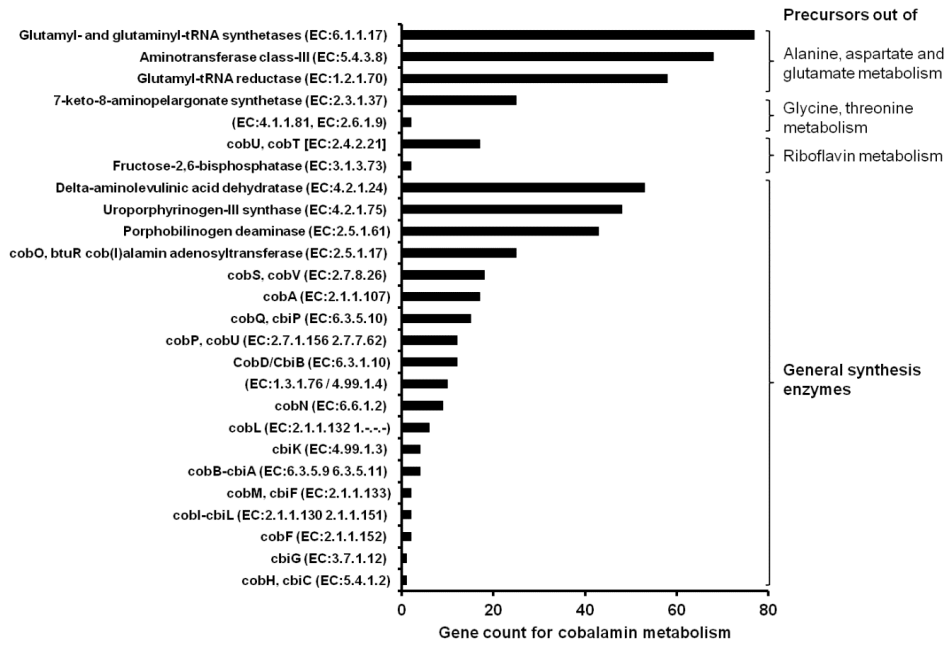

61 FIGURE S5, Krohn-Molt et al 2013

62 **FIGURE S5.** Gene count for cobalamin metabolism. Analysis of the metagenome-  
 63 derived sequences was done using the KEGG database. In total 533 sequences  
 64 were assigned to the metabolism of cobalamin.

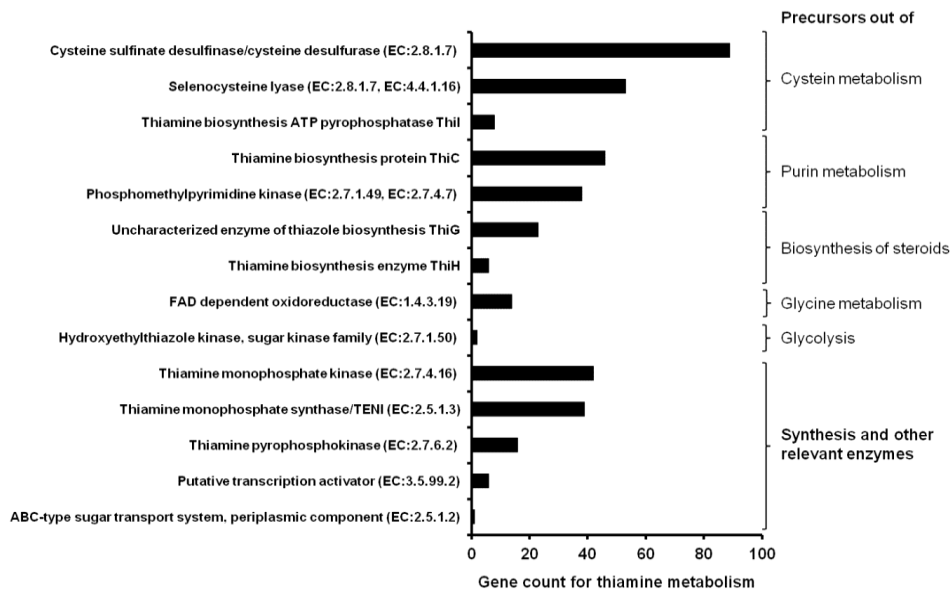

65 FIGURE S6, Krohn-Molt et al 2013

66 **FIGURE S6:** Gene count for thiamine metabolism. Analysis of the metagenome-  
 67 derived sequences was done using the KEGG database. In total 383 sequences  
 68 were assigned to the metabolism of thiamine.

69

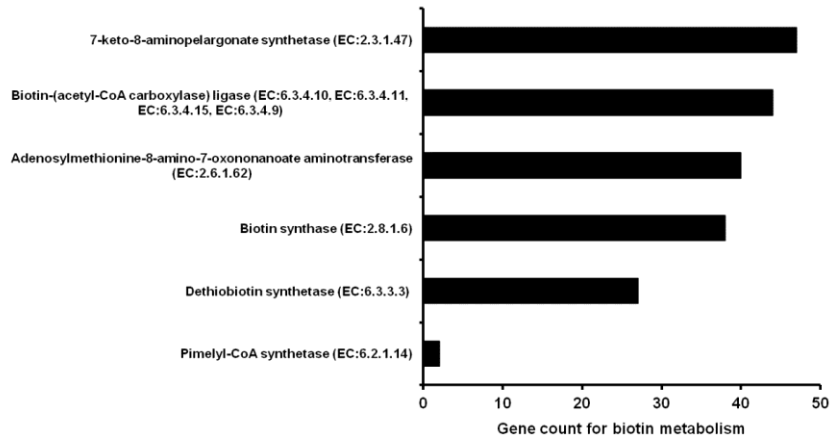

70

FIGURE S7, Krohn-Molt et al 2013

71 **FIGURE S7:** Gene count for biotin metabolism. Analysis of the metagenome-derived  
72 sequences was done using the KEGG database. In total 198 sequences were  
73 assigned to the various biosynthesis steps of the vitamer biotin.

74

75

76

77

78

79

80

81

82

83

84

**SUPPLEMENTAL TABLES**

85 **TABLE S1.** Phylogenetic analysis of 171 16S rRNA clones sequences derived from  
 86 the biofilm's fully established microbial community (T5).

| Phyla/Class         | Sequence count | Order/Family                        | Sequence count |
|---------------------|----------------|-------------------------------------|----------------|
| Alphaproteobacteria | 48             | Sphingomonadales                    | 12             |
|                     |                | Rhodobacterales                     | 7              |
|                     |                | Rhodospirillales                    | 3              |
|                     |                | Rhizobiales                         | 15             |
|                     |                | Caulobacterales                     | 11             |
| Betaproteobacteria  | 26             | Burkholderiales                     | 15             |
|                     |                | uncultured<br>Comamonadaceae        | 11             |
| Deltaproteobacteria | 6              | Desulfovibrionales                  | 3              |
|                     |                | uncultured<br>Deltaproteobacteria   | 3              |
| Gammaproteobacteria | 19             | Xanthomonadales                     | 16             |
|                     |                | uncultured<br>Gammaproteobacteria   | 3              |
|                     |                | Flavobacteriales                    | 10             |
|                     |                | Cytophagales                        | 5              |
|                     |                | uncultured<br>Bacteroidetes         | 13             |
| Actinobacteria      | 9              | Acidimicrobiales                    | 2              |
|                     |                | Actinomycetales                     | 3              |
|                     |                | uncultured<br>Actinobacteria        | 4              |
| Planctomycetes      | 7              | Planctomycetales                    | 7              |
| Verrucomicrobia     | 5              | uncultured<br>Verrucomicrobia       | 5              |
| Chloroflexi         | 3              | uncultured<br>Chloroflexi bacterium | 3              |

|                  |   |                                      |   |
|------------------|---|--------------------------------------|---|
| unknown Bacteria | 4 | Candidate division<br>OP10 bacterium | 2 |
|                  |   | uncultured<br>TM7 bacterium          | 2 |

87

88 **TABLE S2.** Bacteria cultivated from the PBR microbial community on solid media.

| Bacterial Isolate | Closest relatives                                                | 16S rRNA gene identity (%) |
|-------------------|------------------------------------------------------------------|----------------------------|
| A                 | <i>Brevundimonas</i> sp. (JQ661035.1)                            | 94                         |
| B                 | <i>Paracoccus</i> sp. (JQ404485.1)                               | 96                         |
| C                 | <i>Chryseobacterium taichungense</i> (JQ071521.1)                | 99                         |
| D                 | <i>Brevibacterium</i> sp. / <i>Arthrobacter</i> sp. (GQ199748.1) | 99                         |
| E                 | uncultivated / <i>Roseomonas</i> sp. (HQ588850.1)                | 78                         |
| F                 | uncultivated CFB affiliated bacterium (AJ583211.1)               | 96                         |
| G                 | <i>Xanthomonas</i> sp. (EU887990.1)                              | 99                         |
| H                 | <i>Rhodococcus</i> sp. (EU041710.1)                              | 99                         |

89

90

91
